# Supplementary material for: Uncovering a novel role of focal adhesion and interferon-gamma in cellular rejection of kidney allografts at single cell resolution
Source: Front Immunol. 2023 Mar 31;14:1139358. doi: 10.3389/fimmu.2023.1139358 (PMC10102512; doi:10.3389/fimmu.2023.1139358)
Supplement: Supplementary file 8 [file Table_8.xlsx]

## Sheet: L-R Pericytes_EC
Pericytes	EC	interaction.type	LRscore
TNC	PTPRB	paracrine	0.871131
HSPG2	CHRM3	paracrine	0.855705
COL18A1	KDR	paracrine	0.854049
TIMP3	KDR	paracrine	0.834982
COL1A2	FLT4	paracrine	0.834735
FN1	FLT4	paracrine	0.825541
FN1	ROBO4	paracrine	0.815975
PDGFC	FLT4	paracrine	0.808698
COL1A1	FLT4	paracrine	0.789569
PDGFC	KDR	paracrine	0.775214
ARF1	CHRM3	paracrine	0.770697
COL4A2	CD93	paracrine	0.760979
COL4A1	CD93	paracrine	0.745315
SLIT2	ROBO4	paracrine	0.743008
COL4A3	CD93	paracrine	0.737184
VEGFA	KDR	paracrine	0.70778
COL1A2	CD93	paracrine	0.683237
COL4A4	CD93	paracrine	0.66715
SEMA6D	KDR	paracrine	0.65043
FN1	NT5E	paracrine	0.641101
COL4A5	CD93	paracrine	0.635288
HHLA3	CHRM3	paracrine	0.633882
GREM1	KDR	paracrine	0.623877
HMGB1	THBD	paracrine	0.621196
COL1A1	CD93	paracrine	0.615727
THBS1	SCARB1	paracrine	0.605791
TNC	NT5E	paracrine	0.603427
VEGFC	FLT4	paracrine	0.602576
PTMA	VIPR1	paracrine	0.564838
COL18A1	GPC1	paracrine	0.554656
VEGFC	KDR	paracrine	0.552958
VEGFD	FLT4	paracrine	0.542102
ANGPT2	TIE1	paracrine	0.538542
FAT4	DCHS1	paracrine	0.532369
HMGB1	TLR4	paracrine	0.524074
CALM1	VIPR1	paracrine	0.506431
GNAS	VIPR1	paracrine	0.504959
APP	SLC45A3	paracrine	0.504529
CALR	SCARF1	paracrine	0.501524

## Sheet: L-R T cells_EC
T.cells	EC	interaction.type	LRscore
COL18A1	KDR	paracrine	0.773107
PDGFC	FLT4	paracrine	0.770744
ADAM17	ITGA5	paracrine	0.752216
COL18A1	ITGA5	paracrine	0.737001
PDGFC	KDR	paracrine	0.732812
TGFB1	ACVRL1	paracrine	0.721843
SEMA4D	PLXNB1	paracrine	0.715461
PSEN1	NCSTN	paracrine	0.698781
SPP1	ITGA5	paracrine	0.695602
HLA-A	APLP2	paracrine	0.683401
TGFB1	CAV1	paracrine	0.675064
PTH	RAMP3	paracrine	0.671257
CALM2	MYLK	paracrine	0.671134
CALCB	RAMP3	paracrine	0.666241
TGFB1	CD109	paracrine	0.659876
FARP2	PLXNA2	paracrine	0.657559
COL18A1	ITGB3	paracrine	0.653461
CALM1	MYLK	paracrine	0.64631
FN1	FLT4	paracrine	0.635276
COL1A2	FLT4	paracrine	0.628932
TGFB1	ITGB3	paracrine	0.624562
COL4A3	ITGB3	paracrine	0.618622
CALM2	EGFR	paracrine	0.617634
THBS1	SDC4	paracrine	0.617472
TGFB1	SDC2	paracrine	0.609948
CALR	SCARF1	paracrine	0.60758
SPP1	ITGB3	paracrine	0.605942
GNAS	VIPR1	paracrine	0.60345
WNT2B	FZD4	paracrine	0.602067
THBS1	ITGB3	paracrine	0.599804
APP	CAV1	paracrine	0.596891
COL4A3	ITGA2	paracrine	0.595504
CALM1	EGFR	paracrine	0.59123
LIF	LIFR	paracrine	0.582575
GNAI2	CAV1	paracrine	0.574996
COL4A4	ITGB3	paracrine	0.57247
PTMA	VIPR1	paracrine	0.567023
FARP2	PLXNA3	paracrine	0.566171
TGFB1	TGFBR1	paracrine	0.558816
FN1	ITGA8	paracrine	0.558686
CALM1	VIPR1	paracrine	0.558054
WNT3	LRP6	paracrine	0.555327
SLIT1	ROBO1	paracrine	0.554052
SLIT2	ROBO1	paracrine	0.552356
CALM2	GRM7	paracrine	0.549375
COL4A4	ITGA2	paracrine	0.548596
SYTL3	NRXN1	paracrine	0.54821
COL6A1	ITGA2	paracrine	0.542092
APP	NCSTN	paracrine	0.540825
WNT7A	LRP6	paracrine	0.539292
FN1	ITGA5	paracrine	0.538882
CALM2	AQP6	paracrine	0.536859
CALM2	PDE1C	paracrine	0.53592
B2M	HFE	paracrine	0.527263
GNAS	ADCY1	paracrine	0.524508
HLA-C	SLC9C2	paracrine	0.522447
CALM1	GRM7	paracrine	0.521907
HLA-E	SLC16A4	paracrine	0.520445
HMGB1	THBD	paracrine	0.517055
C3	GRM7	paracrine	0.515077
FYN	THY1	paracrine	0.514214
HSP90AA1	ITGB3	paracrine	0.513079
CALM1	AQP6	paracrine	0.509309
CALM1	PDE1C	paracrine	0.508366
ITGB3BP	ITGB3	paracrine	0.504868
MMP7	CD151	paracrine	0.503072
GNAI2	EGFR	paracrine	0.502421
CALCB	CALCRL	paracrine	0.500471
